# Supplementary material for: USP6 Confers Sensitivity to IFN-Mediated Apoptosis through Modulation of TRAIL Signaling in Ewing Sarcoma
Source: Oxford University Press journal article supplement (doi:10.1158/1541-7786.mcr-18-0289), 2018-08-21
Supplement: 15417786mcr180289-sup-199058_3_supp_4900395_pc0s67.xlsx [file 15417786mcr180289-sup-199058_3_supp_4900395_pc0s67.xlsx]

## Sheet: USP6RDES +vs-Dox Induced
USP6+Dox vs USP6-Dox Induced
NAME	SIZE	ES	NES	NOM p-val	FDR q-val	FWER p-val
HALLMARK_INTERFERON_GAMMA_RESPONSE	174	0.741129	2.42708	0	0	0
HALLMARK_INTERFERON_ALPHA_RESPONSE	83	0.78905	2.38846	0	0	0
HALLMARK_TNFA_SIGNALING_VIA_NFKB	181	0.610934	2.0279	0	0	0
HALLMARK_IL6_JAK_STAT3_SIGNALING	83	0.660359	1.99109	0	0	0
HALLMARK_INFLAMMATORY_RESPONSE	185	0.575845	1.88922	0	0	0
HALLMARK_ALLOGRAFT_REJECTION	186	0.540679	1.77929	0	0.000676459	0.004
HALLMARK_KRAS_SIGNALING_UP	177	0.479838	1.57649	0	0.0106644	0.071
HALLMARK_APOPTOSIS	157	0.490556	1.57505	0.00227531	0.00957106	0.073
HALLMARK_COMPLEMENT	186	0.467483	1.56503	0	0.0107976	0.091
HALLMARK_IL2_STAT5_SIGNALING	172	0.47235	1.52908	0.0010929	0.0171008	0.157
HALLMARK_TGF_BETA_SIGNALING	51	0.519541	1.47707	0.017038	0.0305227	0.292
HALLMARK_ANDROGEN_RESPONSE	90	0.445797	1.36559	0.0451843	0.0986279	0.712
HALLMARK_PROTEIN_SECRETION	81	0.449715	1.35336	0.041514	0.103138	0.753
HALLMARK_EPITHELIAL_MESENCHYMAL_TRANSITION	187	0.398701	1.31871	0.0287293	0.137752	0.874
HALLMARK_COAGULATION	129	0.41236	1.3067	0.0522727	0.146123	0.908
HALLMARK_UV_RESPONSE_UP	148	0.402043	1.29954	0.0481523	0.146651	0.92
HALLMARK_APICAL_JUNCTION	176	0.384474	1.2499	0.0631342	0.22051	0.982
HALLMARK_XENOBIOTIC_METABOLISM	183	0.3762	1.23274	0.080574	0.240951	0.99
HALLMARK_KRAS_SIGNALING_DN	179	0.3702	1.20839	0.0985761	0.283691	0.999
HALLMARK_HEME_METABOLISM	163	0.369121	1.20438	0.125141	0.279121	0.999
HALLMARK_UV_RESPONSE_DN	132	0.37715	1.19679	0.127485	0.281985	1
HALLMARK_HYPOXIA	181	0.365848	1.19168	0.112832	0.279188	1
HALLMARK_CHOLESTEROL_HOMEOSTASIS	68	0.403512	1.18708	0.190773	0.27731	1
HALLMARK_P53_PATHWAY	167	0.365715	1.18587	0.134078	0.268006	1
HALLMARK_ANGIOGENESIS	33	0.435427	1.15277	0.242466	0.330494	1
HALLMARK_MITOTIC_SPINDLE	161	0.334223	1.09569	0.25711	0.461037	1
HALLMARK_UNFOLDED_PROTEIN_RESPONSE	94	0.335373	1.03014	0.406659	0.645491	1
HALLMARK_BILE_ACID_METABOLISM	107	0.320275	0.995996	0.482921	0.730342	1
HALLMARK_ESTROGEN_RESPONSE_LATE	189	0.29491	0.973341	0.562162	0.773075	1
HALLMARK_ADIPOGENESIS	170	0.286021	0.934466	0.64	0.866849	1
HALLMARK_SPERMATOGENESIS	112	0.296643	0.933761	0.612457	0.840871	1
HALLMARK_PI3K_AKT_MTOR_SIGNALING	96	0.29297	0.900166	0.659277	0.90423	1
HALLMARK_FATTY_ACID_METABOLISM	136	0.279205	0.896688	0.714769	0.886258	1
HALLMARK_ESTROGEN_RESPONSE_EARLY	171	0.274391	0.895882	0.704367	0.862031	1
HALLMARK_WNT_BETA_CATENIN_SIGNALING	39	0.287604	0.771782	0.820817	1	1
HALLMARK_MTORC1_SIGNALING	176	0.234126	0.765089	0.938664	1	1
HALLMARK_PEROXISOME	94	0.250296	0.763106	0.885645	1	1
HALLMARK_G2M_CHECKPOINT	168	0.207651	0.67663	0.988777	1	1
HALLMARK_NOTCH_SIGNALING	27	0.240028	0.612605	0.971074	1	1
HALLMARK_REACTIVE_OXIGEN_SPECIES_PATHWAY	45	0.22022	0.605506	0.983051	1	1
HALLMARK_OXIDATIVE_PHOSPHORYLATION	186	0.166812	0.545812	1	1	1
HALLMARK_E2F_TARGETS	163	0.1534	0.493254	1	0.999652	1

## Sheet: USP6RDES +vs-Dox Repressed
USP6+Dox vs USP6-Dox Repressed
NAME	SIZE	ES	NES	NOM p-val	FDR q-val	FWER p-val
HALLMARK_MYC_TARGETS_V2	43	-0.626606	-1.99781	0	0	0
HALLMARK_APICAL_SURFACE	40	-0.424086	-1.32954	0.0643777	0.158073	0.239
HALLMARK_MYOGENESIS	186	-0.282797	-1.13569	0.116883	0.440857	0.711
HALLMARK_PANCREAS_BETA_CELLS	36	-0.355403	-1.09447	0.262295	0.449617	0.809
HALLMARK_GLYCOLYSIS	178	-0.253777	-1.03326	0.366337	0.575897	0.923
HALLMARK_HEDGEHOG_SIGNALING	34	-0.298061	-0.925974	0.576471	0.892942	0.989
HALLMARK_MYC_TARGETS_V1	168	-0.222119	-0.891118	0.821138	0.86914	0.992
HALLMARK_DNA_REPAIR	133	-0.194434	-0.743087	0.991228	0.968299	0.999

## Sheet: GSE7007 Ewing USP6high Induced
GSE7007 Ewing USP6+ Induced
NAME	SIZE	ES	NES	NOM p-val	FDR q-val	FWER p-val
HALLMARK_MYOGENESIS	196	0.528269	2.8544	0	0	0
HALLMARK_KRAS_SIGNALING_DN	188	0.373175	2.02139	0	0.00133333	0.002
HALLMARK_KRAS_SIGNALING_UP	191	0.317502	1.70804	0	0.00586964	0.014
HALLMARK_ALLOGRAFT_REJECTION	191	0.286539	1.5778	0	0.0192475	0.06
HALLMARK_BILE_ACID_METABOLISM	99	0.279543	1.39118	0.0125523	0.0616591	0.226
HALLMARK_INTERFERON_ALPHA_RESPONSE	77	0.287921	1.35962	0.0322581	0.0654579	0.28
HALLMARK_IL6_JAK_STAT3_SIGNALING	85	0.284503	1.35303	0.0456432	0.0601419	0.298
HALLMARK_INTERFERON_GAMMA_RESPONSE	171	0.250493	1.35207	0.00621118	0.0529241	0.299
HALLMARK_COAGULATION	132	0.258167	1.3175	0.0382514	0.0617966	0.383
HALLMARK_ANGIOGENESIS	34	0.313318	1.22183	0.171598	0.118555	0.658
HALLMARK_WNT_BETA_CATENIN_SIGNALING	37	0.301286	1.21969	0.162712	0.109281	0.665
HALLMARK_INFLAMMATORY_RESPONSE	185	0.19146	1.03332	0.391304	0.364918	0.98

## Sheet: GSE7007 Ewing USP6hig Repressed
GSE7007 Ewing USP6+ Repressed
NAME	SIZE	ES	NES	NOM p-val	FDR q-val	FWER p-val
HALLMARK_E2F_TARGETS	167	-0.713317	-3.17846	0	0	0
HALLMARK_G2M_CHECKPOINT	176	-0.634758	-2.85954	0	0	0
HALLMARK_MYC_TARGETS_V1	171	-0.606098	-2.71488	0	0	0
HALLMARK_MTORC1_SIGNALING	182	-0.568147	-2.58941	0	0	0
HALLMARK_DNA_REPAIR	135	-0.578617	-2.53111	0	0	0
HALLMARK_PROTEIN_SECRETION	88	-0.573202	-2.34376	0	0	0
HALLMARK_MITOTIC_SPINDLE	166	-0.493853	-2.22858	0	0	0
HALLMARK_UNFOLDED_PROTEIN_RESPONSE	104	-0.509878	-2.15253	0	0	0
HALLMARK_MYC_TARGETS_V2	46	-0.555648	-2.02093	0	0.000201172	0.002
HALLMARK_CHOLESTEROL_HOMEOSTASIS	60	-0.5152	-1.94515	0	0.000181055	0.002
HALLMARK_GLYCOLYSIS	176	-0.417822	-1.91216	0	0.000341868	0.004
HALLMARK_REACTIVE_OXIGEN_SPECIES_PATHWAY	43	-0.491583	-1.78041	0	0.00134368	0.016
HALLMARK_TGF_BETA_SIGNALING	49	-0.440131	-1.64504	0.0130058	0.00719025	0.095
HALLMARK_APOPTOSIS	157	-0.365087	-1.62425	0.00119474	0.00769736	0.107
HALLMARK_EPITHELIAL_MESENCHYMAL_TRANSITION	189	-0.355395	-1.6131	0	0.00796802	0.12
HALLMARK_ANDROGEN_RESPONSE	94	-0.386806	-1.60949	0.00377358	0.00777026	0.125
HALLMARK_PI3K_AKT_MTOR_SIGNALING	96	-0.377867	-1.57219	0.0102696	0.0103528	0.172
HALLMARK_OXIDATIVE_PHOSPHORYLATION	188	-0.33649	-1.5304	0.00358852	0.0146042	0.244
HALLMARK_PEROXISOME	94	-0.351175	-1.46231	0.013089	0.0275767	0.431
HALLMARK_UV_RESPONSE_UP	150	-0.330593	-1.44912	0.00974422	0.0299979	0.478
HALLMARK_NOTCH_SIGNALING	26	-0.411426	-1.34487	0.0943683	0.0793406	0.84
HALLMARK_FATTY_ACID_METABOLISM	140	-0.295886	-1.30864	0.0611995	0.105212	0.929
HALLMARK_TNFA_SIGNALING_VIA_NFKB	185	-0.272949	-1.24599	0.0824623	0.171193	0.993
HALLMARK_APICAL_JUNCTION	180	-0.258762	-1.17594	0.160188	0.277561	1
HALLMARK_ESTROGEN_RESPONSE_EARLY	182	-0.255529	-1.16409	0.173505	0.288997	1
HALLMARK_ADIPOGENESIS	169	-0.257078	-1.14626	0.206428	0.311465	1
HALLMARK_UV_RESPONSE_DN	135	-0.243592	-1.06645	0.32638	0.478445	1
HALLMARK_HYPOXIA	182	-0.220208	-0.994629	0.471292	0.647281	1
HALLMARK_ESTROGEN_RESPONSE_LATE	193	-0.214354	-0.990633	0.494712	0.634823	1
HALLMARK_SPERMATOGENESIS	117	-0.22363	-0.957923	0.541667	0.700318	1
HALLMARK_COMPLEMENT	181	-0.206722	-0.941201	0.605988	0.72193	1
HALLMARK_HEME_METABOLISM	183	-0.205632	-0.933611	0.641266	0.718527	1
HALLMARK_XENOBIOTIC_METABOLISM	185	-0.204722	-0.929414	0.641618	0.70753	1
HALLMARK_P53_PATHWAY	182	-0.200912	-0.908734	0.662665	0.732392	1
HALLMARK_IL2_STAT5_SIGNALING	169	-0.197413	-0.88919	0.737095	0.758334	1
HALLMARK_APICAL_SURFACE	33	-0.234445	-0.785394	0.803545	0.930701	1
HALLMARK_PANCREAS_BETA_CELLS	36	-0.219335	-0.765962	0.816092	0.93114	1
HALLMARK_HEDGEHOG_SIGNALING	35	-0.219628	-0.765906	0.81686	0.906685	1

## Sheet: GSE37371 Ewing USP6hi Induced
GSE37371 Ewing USP6+ Induced
NAME	SIZE	ES	NES	NOM p-val	FDR q-val	FWER p-val
HALLMARK_MYOGENESIS	196	0.458723	2.27151	0	0	0
HALLMARK_INTERFERON_ALPHA_RESPONSE	77	0.442927	1.88418	0	0.00344429	0.005
HALLMARK_INTERFERON_GAMMA_RESPONSE	171	0.329803	1.60248	0	0.0341624	0.062
HALLMARK_ALLOGRAFT_REJECTION	191	0.320597	1.59086	0	0.02936	0.072
HALLMARK_KRAS_SIGNALING_DN	188	0.272616	1.3533	0.0107527	0.163363	0.416
HALLMARK_INFLAMMATORY_RESPONSE	185	0.277968	1.3511	0.0307167	0.13781	0.42
HALLMARK_XENOBIOTIC_METABOLISM	185	0.269295	1.32587	0.00949367	0.148611	0.496
HALLMARK_IL2_STAT5_SIGNALING	169	0.264178	1.28912	0.0410959	0.179734	0.623
HALLMARK_COAGULATION	132	0.268832	1.27323	0.0668693	0.179559	0.661
HALLMARK_MYC_TARGETS_V2	46	0.315306	1.21728	0.163043	0.25329	0.836
HALLMARK_IL6_JAK_STAT3_SIGNALING	85	0.27574	1.2034	0.116992	0.254704	0.862
HALLMARK_ANGIOGENESIS	34	0.329836	1.186	0.206977	0.266187	0.895
HALLMARK_ADIPOGENESIS	169	0.228138	1.10871	0.235294	0.42627	0.985
HALLMARK_APICAL_SURFACE	33	0.306998	1.0872	0.334177	0.457254	0.991
HALLMARK_KRAS_SIGNALING_UP	191	0.221792	1.08457	0.250922	0.434294	0.992
HALLMARK_HEME_METABOLISM	183	0.208518	1.03077	0.373702	0.56545	0.998
HALLMARK_GLYCOLYSIS	176	0.200592	0.99593	0.454248	0.650273	1
HALLMARK_HYPOXIA	182	0.196221	0.962557	0.5625	0.73018	1
HALLMARK_FATTY_ACID_METABOLISM	140	0.203004	0.957712	0.552632	0.707547	1
HALLMARK_BILE_ACID_METABOLISM	99	0.204155	0.919605	0.645833	0.791366	1
HALLMARK_COMPLEMENT	181	0.188703	0.917762	0.701389	0.758539	1
HALLMARK_TNFA_SIGNALING_VIA_NFKB	185	0.180776	0.896459	0.742268	0.784405	1
HALLMARK_WNT_BETA_CATENIN_SIGNALING	37	0.228471	0.845645	0.734849	0.868789	1
HALLMARK_REACTIVE_OXIGEN_SPECIES_PATHWAY	43	0.213655	0.807664	0.785166	0.895269	1

## Sheet: GSE37371 Ewing USP6hi Repressed
GSE37371 Ewing USP6+ Repressed
NAME	SIZE	ES	NES	NOM p-val	FDR q-val	FWER p-val
HALLMARK_E2F_TARGETS	167	-0.557004	-2.45803	0	0	0
HALLMARK_G2M_CHECKPOINT	176	-0.543457	-2.43963	0	0	0
HALLMARK_MITOTIC_SPINDLE	166	-0.398895	-1.76037	0	0.00446273	0.017
HALLMARK_DNA_REPAIR	135	-0.395854	-1.72743	0	0.00537039	0.026
HALLMARK_PROTEIN_SECRETION	88	-0.39321	-1.57588	0.00620155	0.0237252	0.145
HALLMARK_MYC_TARGETS_V1	171	-0.344526	-1.53267	0	0.031685	0.216
HALLMARK_P53_PATHWAY	182	-0.333678	-1.53024	0	0.0281406	0.225
HALLMARK_ESTROGEN_RESPONSE_LATE	193	-0.330175	-1.51049	0.00284091	0.0299599	0.269
HALLMARK_APOPTOSIS	157	-0.337874	-1.49145	0.00562588	0.0322147	0.311
HALLMARK_UV_RESPONSE_DN	135	-0.329502	-1.42722	0.020649	0.0514769	0.488
HALLMARK_ESTROGEN_RESPONSE_EARLY	182	-0.304157	-1.36439	0.029661	0.0860968	0.718
HALLMARK_PI3K_AKT_MTOR_SIGNALING	96	-0.325602	-1.35496	0.0606061	0.0862611	0.748
HALLMARK_ANDROGEN_RESPONSE	94	-0.325676	-1.32302	0.0608828	0.106029	0.86
HALLMARK_MTORC1_SIGNALING	182	-0.291371	-1.30172	0.0418354	0.115404	0.893
HALLMARK_PANCREAS_BETA_CELLS	36	-0.370326	-1.28256	0.140704	0.127502	0.926
HALLMARK_HEDGEHOG_SIGNALING	35	-0.37327	-1.25511	0.162162	0.148276	0.953
HALLMARK_TGF_BETA_SIGNALING	49	-0.314971	-1.15697	0.237398	0.284219	0.999
HALLMARK_NOTCH_SIGNALING	26	-0.353763	-1.14202	0.265378	0.296233	1
HALLMARK_UV_RESPONSE_UP	150	-0.253608	-1.12041	0.221566	0.321711	1
HALLMARK_UNFOLDED_PROTEIN_RESPONSE	104	-0.264983	-1.09847	0.286996	0.35233	1
HALLMARK_CHOLESTEROL_HOMEOSTASIS	60	-0.276075	-1.04824	0.380259	0.445441	1
HALLMARK_SPERMATOGENESIS	117	-0.244115	-1.03738	0.374636	0.449821	1
HALLMARK_OXIDATIVE_PHOSPHORYLATION	188	-0.220136	-1.00009	0.463519	0.516239	1
HALLMARK_EPITHELIAL_MESENCHYMAL_TRANSITION	189	-0.200223	-0.910851	0.685754	0.71463	1
HALLMARK_APICAL_JUNCTION	180	-0.184572	-0.824107	0.880618	0.875648	1
HALLMARK_PEROXISOME	94	-0.194714	-0.796252	0.876877	0.886832	1

## Sheet: Seminoma vs Yolk Sac Induced
Seminoma vs Yolk Sac Induced
NAME	SIZE	ES	NES	NOM p-val	FDR q-val	FWER p-val
HALLMARK_ALLOGRAFT_REJECTION	191	0.659897	2.54956	0	0	0
HALLMARK_INTERFERON_GAMMA_RESPONSE	171	0.632471	2.3982	0	0	0
HALLMARK_INTERFERON_ALPHA_RESPONSE	77	0.622764	2.10812	0	0	0
HALLMARK_IL6_JAK_STAT3_SIGNALING	85	0.503287	1.7282	0	0.00270952	0.012
HALLMARK_MYC_TARGETS_V2	46	0.554267	1.705	0.00199601	0.00325709	0.017
HALLMARK_SPERMATOGENESIS	117	0.452567	1.64582	0	0.00490348	0.032
HALLMARK_E2F_TARGETS	167	0.426035	1.60412	0	0.0081309	0.062
HALLMARK_INFLAMMATORY_RESPONSE	185	0.41998	1.60348	0	0.00723954	0.063
HALLMARK_KRAS_SIGNALING_UP	191	0.396789	1.52814	0	0.0134367	0.122
HALLMARK_G2M_CHECKPOINT	176	0.314893	1.21987	0.0604651	0.20261	0.909
HALLMARK_COMPLEMENT	181	0.316132	1.20647	0.078125	0.207143	0.935
HALLMARK_APOPTOSIS	157	0.312925	1.17703	0.118568	0.236465	0.963
HALLMARK_APICAL_SURFACE	33	0.394511	1.15224	0.259843	0.262462	0.977
HALLMARK_MYC_TARGETS_V1	171	0.274178	1.04265	0.349425	0.498313	1
HALLMARK_UV_RESPONSE_UP	150	0.280943	1.04211	0.352809	0.466311	1
HALLMARK_MTORC1_SIGNALING	182	0.264909	1.01509	0.410072	0.511322	1
HALLMARK_MITOTIC_SPINDLE	166	0.267756	1.01304	0.426407	0.486436	1
HALLMARK_KRAS_SIGNALING_DN	188	0.23579	0.90037	0.758537	0.793765	1
HALLMARK_PI3K_AKT_MTOR_SIGNALING	96	0.247237	0.864394	0.762332	0.842627	1
HALLMARK_DNA_REPAIR	135	0.219065	0.812593	0.936543	0.896744	1

## Sheet: Seminoma vs Yolk Sac Repressed
Seminoma vs Yolk Sac Repressed
NAME	SIZE	ES	NES	NOM p-val	FDR q-val	FWER p-val
HALLMARK_EPITHELIAL_MESENCHYMAL_TRANSITION	189	-0.604736	-2.25283	0	0	0
HALLMARK_COAGULATION	132	-0.599673	-2.13985	0	0	0
HALLMARK_TGF_BETA_SIGNALING	49	-0.66897	-2.01485	0	0	0
HALLMARK_MYOGENESIS	196	-0.519959	-1.95527	0	0	0
HALLMARK_CHOLESTEROL_HOMEOSTASIS	60	-0.615463	-1.94474	0	0	0
HALLMARK_ANGIOGENESIS	34	-0.681336	-1.8906	0	0	0
HALLMARK_HYPOXIA	182	-0.493535	-1.83785	0	0.000717735	0.005
HALLMARK_ESTROGEN_RESPONSE_EARLY	182	-0.492393	-1.82505	0	0.00103787	0.008
HALLMARK_NOTCH_SIGNALING	26	-0.678973	-1.79421	0.00208768	0.00111583	0.01
HALLMARK_ESTROGEN_RESPONSE_LATE	193	-0.47571	-1.77779	0	0.00123963	0.012
HALLMARK_UV_RESPONSE_DN	135	-0.487754	-1.74032	0	0.00170863	0.018
HALLMARK_XENOBIOTIC_METABOLISM	185	-0.461741	-1.70186	0	0.00260036	0.029
HALLMARK_GLYCOLYSIS	176	-0.449156	-1.64428	0	0.00434084	0.053
HALLMARK_BILE_ACID_METABOLISM	99	-0.459563	-1.58612	0.00724638	0.00690043	0.085
HALLMARK_ADIPOGENESIS	169	-0.421525	-1.54836	0.0035461	0.0090838	0.121
HALLMARK_PANCREAS_BETA_CELLS	36	-0.513159	-1.47177	0.0415842	0.0232252	0.287
HALLMARK_ANDROGEN_RESPONSE	94	-0.431625	-1.45466	0.0164835	0.0260725	0.334
HALLMARK_APICAL_JUNCTION	180	-0.382844	-1.40184	0.00831947	0.039932	0.495
HALLMARK_FATTY_ACID_METABOLISM	140	-0.391117	-1.40142	0.0179211	0.0378768	0.496
HALLMARK_PEROXISOME	94	-0.393141	-1.3461	0.0655738	0.0614914	0.691
HALLMARK_WNT_BETA_CATENIN_SIGNALING	37	-0.455949	-1.3027	0.109434	0.0836433	0.829
HALLMARK_OXIDATIVE_PHOSPHORYLATION	188	-0.342687	-1.28114	0.0456853	0.0944862	0.873
HALLMARK_HEDGEHOG_SIGNALING	35	-0.440839	-1.25157	0.155419	0.114382	0.917
HALLMARK_P53_PATHWAY	182	-0.323382	-1.1977	0.0961538	0.164881	0.982
HALLMARK_TNFA_SIGNALING_VIA_NFKB	185	-0.322049	-1.18903	0.120939	0.170606	0.99
HALLMARK_HEME_METABOLISM	183	-0.297351	-1.10326	0.223636	0.287042	1
HALLMARK_IL2_STAT5_SIGNALING	169	-0.290666	-1.05674	0.328622	0.367622	1
HALLMARK_REACTIVE_OXIGEN_SPECIES_PATHWAY	43	-0.289991	-0.862487	0.695413	0.838576	1
HALLMARK_PROTEIN_SECRETION	88	-0.22609	-0.755905	0.933333	0.981432	1
HALLMARK_UNFOLDED_PROTEIN_RESPONSE	104	-0.190004	-0.655085	0.998195	0.990924	1

## Sheet: Nod Fas vs Other Induced
Nodular Fasciitis vs Other Tumors Induced
NAME	SIZE	ES	NES	NOM p-val	FDR q-val	FWER p-val
HALLMARK_INTERFERON_GAMMA_RESPONSE	199	0.674902	2.82968	0	0	0
HALLMARK_INTERFERON_ALPHA_RESPONSE	96	0.724094	2.73119	0	0	0
HALLMARK_INFLAMMATORY_RESPONSE	200	0.643706	2.67607	0	0	0
HALLMARK_MYOGENESIS	196	0.609274	2.52669	0	0	0
HALLMARK_EPITHELIAL_MESENCHYMAL_TRANSITION	200	0.585904	2.41763	0	0	0
HALLMARK_ALLOGRAFT_REJECTION	199	0.576082	2.38291	0	0	0
HALLMARK_TNFA_SIGNALING_VIA_NFKB	198	0.577858	2.37744	0	0	0
HALLMARK_IL6_JAK_STAT3_SIGNALING	87	0.619697	2.31111	0	0	0
HALLMARK_COMPLEMENT	199	0.550606	2.27639	0	0	0
HALLMARK_COAGULATION	137	0.524151	2.06647	0	0	0
HALLMARK_ANGIOGENESIS	36	0.62492	1.93983	0.0026738	0.00027972	0.001
HALLMARK_HYPOXIA	195	0.430007	1.78949	0	0.00162876	0.007
HALLMARK_IL2_STAT5_SIGNALING	193	0.43017	1.77929	0	0.00150348	0.007
HALLMARK_OXIDATIVE_PHOSPHORYLATION	196	0.426375	1.76874	0	0.00189495	0.01
HALLMARK_KRAS_SIGNALING_UP	198	0.418981	1.73092	0	0.00221398	0.013
HALLMARK_MTORC1_SIGNALING	196	0.396728	1.64456	0	0.00583972	0.038
HALLMARK_REACTIVE_OXIGEN_SPECIES_PATHWAY	47	0.509857	1.64173	0.00763359	0.00571616	0.04
HALLMARK_APOPTOSIS	161	0.390256	1.56287	0	0.0115757	0.085
HALLMARK_P53_PATHWAY	193	0.353506	1.45226	0.00358423	0.0287595	0.2
HALLMARK_UV_RESPONSE_DN	139	0.355267	1.41349	0.0152905	0.0362311	0.261
HALLMARK_UNFOLDED_PROTEIN_RESPONSE	113	0.366784	1.41059	0.0154799	0.0349255	0.265
HALLMARK_PROTEIN_SECRETION	96	0.371093	1.40835	0.0116279	0.0342387	0.271
HALLMARK_FATTY_ACID_METABOLISM	154	0.345507	1.38739	0.0222222	0.0396407	0.311
HALLMARK_GLYCOLYSIS	197	0.327943	1.36553	0.0103093	0.0461714	0.368
HALLMARK_NOTCH_SIGNALING	31	0.424732	1.30181	0.125	0.0744292	0.529
HALLMARK_ADIPOGENESIS	197	0.31059	1.28895	0.0265781	0.0793129	0.566
HALLMARK_APICAL_JUNCTION	198	0.302106	1.25821	0.0321429	0.099076	0.646
HALLMARK_UV_RESPONSE_UP	157	0.302316	1.21972	0.0606936	0.134728	0.78
HALLMARK_MITOTIC_SPINDLE	197	0.28487	1.19039	0.0735294	0.165141	0.863
HALLMARK_HEME_METABOLISM	196	0.267682	1.10877	0.202749	0.295541	0.972
HALLMARK_CHOLESTEROL_HOMEOSTASIS	72	0.304714	1.10415	0.266667	0.295065	0.975
HALLMARK_ANDROGEN_RESPONSE	101	0.284321	1.08061	0.290625	0.335305	0.991
HALLMARK_TGF_BETA_SIGNALING	54	0.318556	1.06014	0.342784	0.371169	0.994
HALLMARK_XENOBIOTIC_METABOLISM	200	0.239952	1.00256	0.452899	0.513121	0.999
HALLMARK_E2F_TARGETS	189	0.201794	0.843842	0.890729	0.979799	1
HALLMARK_PI3K_AKT_MTOR_SIGNALING	104	0.218363	0.834467	0.859375	0.970543	1
HALLMARK_MYC_TARGETS_V1	192	0.199056	0.819258	0.952218	0.971035	1
HALLMARK_G2M_CHECKPOINT	190	0.185952	0.76233	0.989655	1	1
HALLMARK_DNA_REPAIR	148	0.183437	0.741524	0.990625	0.992334	1
HALLMARK_MYC_TARGETS_V2	56	0.212866	0.720343	0.94832	0.976632	1

## Sheet: Nod Fas vs Other Repressed
Nodular Fasciitis vs Other Tumors Repressed
NAME	SIZE	ES	NES	NOM p-val	FDR q-val	FWER p-val
HALLMARK_KRAS_SIGNALING_DN	197	-0.433476	-1.64629	0.00141443	0.0145959	0.047
HALLMARK_PANCREAS_BETA_CELLS	40	-0.535315	-1.59388	0.0118443	0.0129707	0.082
HALLMARK_SPERMATOGENESIS	131	-0.385905	-1.40238	0.0194611	0.0705616	0.512
HALLMARK_ESTROGEN_RESPONSE_LATE	200	-0.331767	-1.26893	0.0523416	0.186267	0.916
HALLMARK_HEDGEHOG_SIGNALING	36	-0.370862	-1.09036	0.331624	0.556789	1
HALLMARK_WNT_BETA_CATENIN_SIGNALING	42	-0.343696	-1.04928	0.383944	0.588552	1
HALLMARK_APICAL_SURFACE	44	-0.332763	-1.01834	0.431239	0.593633	1
HALLMARK_ESTROGEN_RESPONSE_EARLY	193	-0.264583	-1.00602	0.442281	0.551852	1
HALLMARK_PEROXISOME	100	-0.279767	-0.988579	0.459877	0.534287	1
HALLMARK_BILE_ACID_METABOLISM	112	-0.217476	-0.76693	0.903374	0.93369	1
